# Supplementary material for: Dietary intake of table olives exerts antihypertensive effects in association with changes in gut microbiota in spontaneously hypertensive rats
Source: Royal Society of Chemistry journal article supplement (doi:10.1039/d2fo02928f), 2023-01-01
Supplement: d2fo02928f1.pdf [file d2fo02928f1.pdf]

**Table S1.** Content of bioactive compounds in Arbequina table olives and dose administered to spontaneously hypertensive rats (SHR).

| Compound                           | mg/kg destoned olives | mg/kg rat body weight |
|------------------------------------|-----------------------|-----------------------|
| <b>Pentacyclic triterpenes</b>     |                       |                       |
| <i><b>Triterpenic acids</b></i>    |                       |                       |
| Maslinic acid                      | 2395.3 ± 129.8        | 9.222                 |
| Oleanolic acid                     | 902.6 ± 65.7          | 3.475                 |
| Ursolic acid                       | <LOD                  |                       |
| <i><b>Triterpenic alcohols</b></i> |                       |                       |
| Erythrodiol                        | 10.3 ± 0.1            | 0.040                 |
| Uvaol                              | <LOD                  |                       |
| <b>Phenolic compound</b>           |                       |                       |
| <i><b>Phenolic alcohols</b></i>    |                       |                       |
| Hydroxytyrosol                     | 468.9 ± 20.5          | 1.805                 |
| Hydroxytyrosol acetate             | 26.4 ± 1.1            | 0.102                 |
| Tyrosol                            | 23.7 ± 0.8            | 0.091                 |
| Salidroside                        | 17.2 ± 1.8            | 0.066                 |
| Catechol                           | <LOD                  |                       |
| <i><b>Phenolic acids</b></i>       |                       |                       |
| Vanillic acid                      | 3.6 ± 0.1             | 0.014                 |
| <i>p</i> -Coumaric acid            | 5.7 ± 0.2             | 0.022                 |
| Caffeic acid                       | 4.8 ± 0.2             | 0.018                 |
| Verbascoside                       | 347.8 ± 54.1          | 1.339                 |
| <i><b>Flavonoids</b></i>           |                       |                       |
| Luteolin                           | 89.6 ± 5.2            | 0.345                 |
| Luteolin-7- <i>O</i> -glucoside    | 10.5 ± 2.1            | 0.040                 |
| Quercetin                          | 6.4 ± 0.2             | 0.025                 |
| Rutin                              | 23.6 ± 3.5            | 0.091                 |
| Apigenin                           | 4.7 ± 0.3             | 0.018                 |
| <i><b>Secoiridoids</b></i>         |                       |                       |
| Oleuropein                         | 12.2 ± 0.1            | 0.047                 |
| <i><b>Lignans</b></i>              |                       |                       |
| Pinoresinol                        | 3.2 ± 0.3             | 0.012                 |

Results are presented as mean ± SEM of pentacyclic triterpenes and phenolic compounds in Arbequina table olives (n = 5). The analysis of bioactive compounds was performed by liquid-liquid extraction using methanol-ethanol as a solvent prior to the determination of pentacyclic triterpenes by liquid chromatography (LC)-atmospheric pressure chemical ionization-mass spectrometry (MS) and polyphenols by LC-electrospray ionization MS/MS.<sup>1</sup> LOD, limit of detection.

## Reference

- 1 R. Moreno-González, M. E. Juan, J. M. Planas, Profiling of pentacyclic triterpenes and polyphenols by LC-MS in Arbequina and Empeltre table olives, *LWT-Food Sci. Technol.*, 2020, **126**, 109310.
